# Supplementary figures and images for: Lung ultrasound compared with chest X‐ray in diagnosing postoperative pulmonary complications following cardiothoracic surgery: a prospective observational study
Source: PubMed Central journal article supplement — Anaesthesia. 2018 Mar 12;73(8):946–54. doi: 10.1111/anae.14243 (PMC6099367; doi:10.1111/anae.14243), 2018-03-12

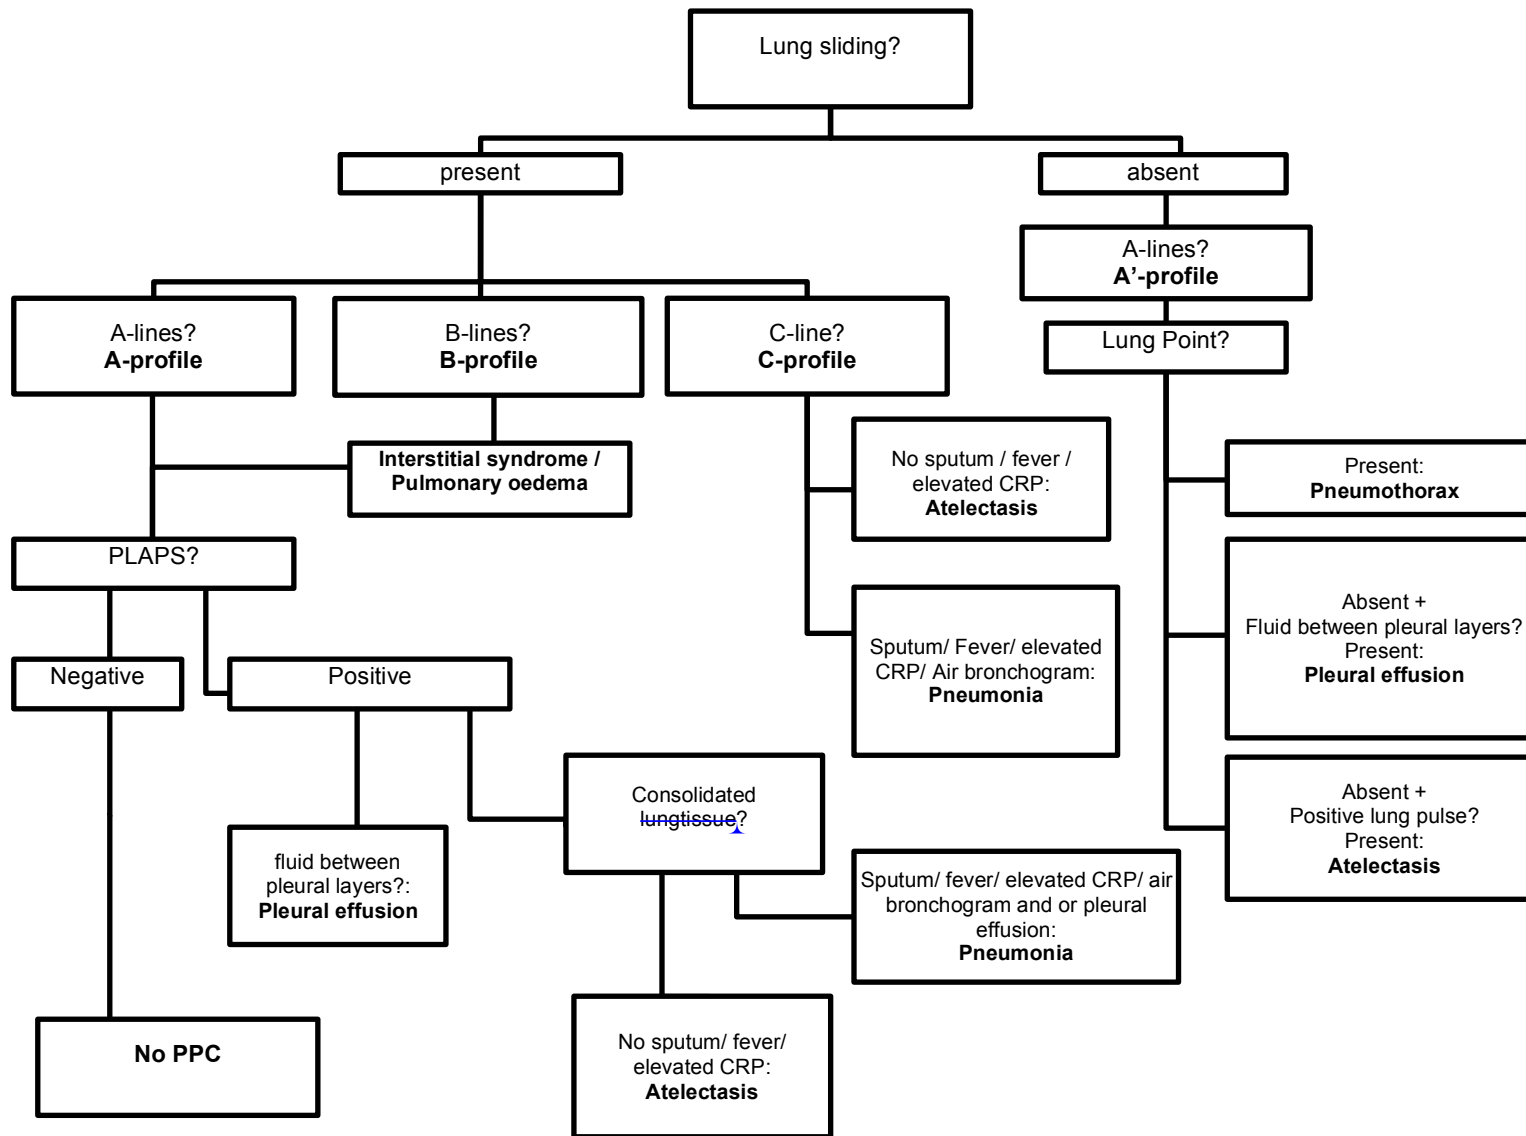

Supplement: ANAE-73-946-s003.pdf [file ANAE-73-946-s003.pdf]
